# Supplementary material for: Investigation of PALB2 Mutation and Correlation With Immunotherapy Biomarker in Chinese Non-Small Cell Lung Cancer Patients
Source: Front Oncol. 2022 Jan 11;11:742833. doi: 10.3389/fonc.2021.742833 (PMC8787147; doi:10.3389/fonc.2021.742833)
Supplement: Supplementary file 1 [file Table_1.xlsx]

## Sheet: Table3_mut_frequency_v3
Supplementary Table 1 summary of common mutants and subtypes in NSCLC patients with PALB2 mutations
GENE	gmut_freq	gmut_mutation	smut_freq	smut_mutation
PALB2	1	p.I888V,p.D498Y,p.D498Y,p.C1127R,p.E19K,p.R37H,p.S652N,p.M1007L,p.A38V,p.D498Y,p.S652N,p.E352Q,p.R510G,p.V711I,p.D498Y,p.P240T,p.E373K,p.C1127R,p.H553Q,p.T51I,p.D498Y,p.D498Y,p.Q921Tfs*7,p.K50T,p.D498Y,p.H69Y,p.P405A,p.S652N,p.L315M,p.D446G,p.T710M,p.P113A,p.S537L,p.R753*,p.P405A,p.D498Y,p.P782Q,p.S97Y,p.F107I,p.D498Y,p.D498Y,p.E352Q,p.R37H,p.S652N,p.H553Q,p.T787I,p.S1075R,p.D777Lfs*26,p.I1131V,p…	1	p.P405L,p.T1029S,p.P1088L,p.S700L,p.K569I,p.A1063V,p.K555N,p.D715N,p.K353Nfs*3,p.A38G,p.N330S,p.R975S,p.E352Q,p.K569R,p.K486E,p.G492W,p.E53V,p.D498Y,p.N452S,p.S652N,p.N442K,p.D498Y,p.E12Q,p.N335S,p.C57S,p.G1028R,p.S359C,p.F1090Y,p.R942K,p.S981C,loss,p.K436N,p.R942T,p.E91Kfs*86,p.R686S,p.E12V,p.E211K,p.E352Q,p.R686Gfs*23,p.A491S,p.K1124I,p.M296I,p.Y705C,p.S524*,p.D498Y,p.K480E,p.E943D,p.D777N,loss…
TP53	0.65	p.R248Q,p.Y220C,p.G360A,p.P72R,p.P72R,p.P72R,p.P72R,p.P72R,p.P72R,p.P72R,p.P72R,p.P72R,p.P72R,p.P72R,p.P72R,p.P72R,p.P72R,p.P72R,p.P72R,p.P72R,p.P72R,p.P72R,p.P72R,p.P72R,p.P72R,p.P72R,p.P72R,p.P72R,p.P72R,p.P72R,p.P72R,p.P72R,p.P72R,p.P72R,p.P72R,p.P72R,p.P72R,p.P72R,p.P72R,p.P72R,p.P72R,p.P72R,p.P72R,p.P72R,p.P72R,p.P72R,p.P72R,p.P72R,p.P72R,p.P72R,p.P72R,p.P72R	0.741176	p.H179N,p.R273Gfs*72,p.H193L,p.R213*,p.R213Q,p.R65*,p.R158Pfs*12,p.S116C,p.E271*,p.R213L,p.W91*,p.M246V,p.H179Y,p.R273H,p.S90Pfs*33,p.V272L,p.N200Ifs*47,p.P142Lfs*28,p.T125T,p.A84Pfs*39,p.E204*,p.N268I,p.R267P,p.V157F,p.G245C,p.Y126C,p.Q136_A138delinsH,p.R196G,p.V173M,p.T125T,p.C176F,p.Y234C,p.R213L,p.W91*,p.C242F,p.L93Rfs*30,p.V173M,p.R213*,p.G245D,p.Q331H,p.H193R,p.P151R,p.V173M,loss,p.R280G,p.…
CYP2C19	0.51	p.P227P,p.P227P,p.P227P,p.P227P,p.P227P,p.P227P,p.P227P,p.P227P,p.P227P,p.P227P,p.P227P,p.P227P,p.P227P,p.P227P,p.P227P,p.P227P,p.P227P,p.P227P,p.P227P,p.P227P,p.P227P,p.P227P,p.P227P,p.P227P,p.P227P,p.P227P,p.P227P,p.P227P,p.P227P,p.P227P,p.P227P,p.R433W,p.P227P,p.P227P,p.P227P,p.P227P,p.P227P,p.P227P,p.P227P,p.P227P,p.P227P,p.P227P,p.P227P,p.P227P,p.P227P,p.P227P,p.P227P,p.P227P,p.P227P,p.P227P…	0.47	N/A
RAC1	0.45	N/A	0.36	gain,gain,gain,p.A27P,gain
DPYD	0.45	p.F632F,p.F632F,p.F632F,p.F632F,p.F632F,p.F632F,p.F632F,p.F632F,p.F632F,p.I543V,p.F632F,p.I543V,p.I543V,p.F632F,p.F632F,p.F632F,p.I543V,p.F632F,p.I543V,p.I543V,p.I543V,p.I543V,p.I543V,p.F632F,p.I543V,p.I543V,p.F632F,p.I543V,p.F632F,p.I543V,p.I543V,p.I543V,p.I543V,p.I543V,p.I543V,p.F632F,p.I543V,p.F632F,p.I543V,p.F632F,p.I543V,p.I543V,p.I543V,p.F632F,p.I543V,p.I543V,p.F632F,p.I543V,p.I543V,p.I543V…	0.29	N/A
VEGFA	0.44	N/A,p.K321R	0.36	gain,p.R339W,p.K321R
EGFR	0.43	p.M567V, p.E709A, p.E746_S752delinsV,gain	0.301647	p.L858R,p.E746_A750del,p.L858R,p.L858R,p.E709A,p.E746_A750del,p.E746_A750del,p.E746_S752delinsV,p.L858R,p.T638M,p.L747_T751delinsP,p.L747_T751delinsP,gain,p.T790M,p.C797S,p.L858R,p.L858R,gain,p.E746_A750del,gain,p.E746_A750del,p.L858R,gain,p.E746_S752delinsV,p.L861Q,p.A864P,p.L858R,p.E746_A750del,gain,p.L858R,p.K335Q,p.R108G,p.L858R,p.E746_P753delinsLS,p.L747_T751del,gain,p.H773dup,gain,p.G1185V
MGMT	0.42	N/A	0	N/A
CD74	0.4	N/A	0.3	N/A
CYP2D6	0.37875	p.V104A,p.C296R,p.P34S,p.T486S,p.C296R,p.C296R,p.P34S,p.T486S,p.C296R,p.P34S,p.C296R,p.P34S,p.T486S,p.C296R,p.C296R,p.P34S,p.C296R,p.P34S,p.T486S,p.C296R,p.P34S,p.C296R,p.P34S,p.T486S,p.C296R,p.P34S,p.T486S,p.C296R,p.P34S,p.C296R,p.P34S,p.T486S,p.C296R,p.C296R,p.P34S,p.T486S,p.C296R,p.T486S,p.C296R,p.P34S,p.T486S,p.C296R,p.C296R,p.P34S,p.C296R,p.P34S,p.C296R,p.P34S,p.T486S,p.C296R,p.P34S,p.C296R,…	0	N/A
MSH2	0.37	p.Q402E,p.I169V,p.P27A,p.N242S,p.I169V,p.I169V,p.A733T,p.R929*	0.0705882	p.K427Nfs*11,p.S554G,p.G221S,p.N566K,p.I169V
POLD1	0.37	p.R343H,p.V124A,p.R358P,p.V759I,p.D67D	0.0352941	p.N662D,p.D88H,p.I804M
MSH3	0.36875	N/A,p.A1045T,p.A1045T,p.A1045T,p.A1045T,p.A1045T,p.A1045T,p.A1045T,p.A1045T,p.A1045T,p.A1045T,p.A1045T,p.A1045T,p.A1045T,p.A1045T,p.A1045T,p.A1045T,p.A1045T,p.A1045T,p.A1045T,p.A1045T,p.A1045T,p.A1045T,p.A1045T,p.A1045T,p.A1045T,p.A1045T,p.A1045T,p.A1045T,p.A1045T,p.A1045T,p.A1045T,p.A1045T,p.A1045T,p.A1045T,p.A1045T,p.A1045T,p.A1045T,p.A1045T,p.A1045T,p.A1045T,p.A1045T,p.A1045T,p.A1045T,p.A1045T…	0.0705882	p.A57_A62dup,p.P64A,p.A57P,p.A57_A62dup,p.I929V,p.V294L
MDM2	0.36875	N/A	0.0588235	p.E58Q,p.E210D,gain,p.D293N,gain
PRSS1	0.36875	p.S181N,p.K170E,p.S181N,p.K170E,p.S181N,p.K170E,p.S181N,p.K170E,p.S181N,p.K170E,p.S181N,p.K170E,p.S181N,p.K170E,p.S181N,p.K170E,p.S181N,p.K170E,p.S181N,p.M183V,p.K170E,p.S181N,p.K170E,p.S181N,p.K170E,p.S181N,p.M183V,p.K170E,p.S181N,p.K170E,p.S181N,p.K170E,p.S181N,p.K170E,p.S181N,p.K170E,p.S181N,p.D153N,p.K170E,p.S181N,p.K170E,p.S181N,p.K170E,p.S181N,p.K170E,p.S181N,p.K170E,p.S181N,p.K170E,p.S181N…	0.0117647	p.S181N,p.K170E
ERCC1	0.36875	p.N118N,p.N118N,p.N118N,p.N118N,p.N118N,p.N118N,p.N118N,p.N118N,p.N118N,p.N118N,p.N118N,p.N118N,p.N118N,p.N118N,p.N118N,p.N118N,p.N118N,p.N118N,p.N118N,p.N118N,p.N118N,p.N118N,p.N118N,p.N118N,p.N118N,p.N118N,p.N118N,p.N118N,p.N118N,p.N118N,p.N118N,p.N118N,p.N118N,p.N118N,p.N118N,p.N118N,p.N118N,p.N118N,p.N118N,p.N118N,p.N118N,p.N118N,p.N118N,p.N118N,p.N118N,p.N118N,p.N118N,p.N118N,p.N118N,p.N118N…	0	N/A
BLM	0.3625	p.P956L,p.M348I,p.Y784C,p.Y1160H,p.M348I,p.T1389A,p.R791C	0.0588235	p.P242A,p.D1188N,p.R910K,p.S313F
PRKDC	0.3625	N/A	0.0235294	gain,loss
ERCC2	0.3625	N/A,p.K751Q,p.K751Q,p.D312N,p.K751Q,p.K751Q,p.D312N,p.K751Q,p.D312N,p.K751Q,p.K751Q,p.K751Q,p.D312N	0.0117647	p.M247V
BRIP1	0.35625	p.Q944E,p.N775S,p.S919P,p.E296D,p.S919P,p.S919P,p.S919P,p.S919P,p.S919P,p.S919P,p.S919P,p.S919P,p.S919P,p.S919P,p.S919P,p.G481D,p.R419W,p.S919P,p.S919P,p.S919P,p.S919P,p.S919P,p.S919P,p.S919P,p.S919P,p.S919P,p.S919P,p.S919P,p.S919P,p.S919P,p.S919P,p.S919P,p.S919P,p.S919P,p.S919P,p.S919P,p.S919P,p.S919P,p.S919P,p.S919P,p.S919P,p.S919P,p.S919P,p.S919P,p.S919P,p.S919P,p.S919P,p.S919P,p.S919P,p.S919P…	0.0117647	loss
ERCC5	0.35625	N/A,p.H46H,p.H46H,p.D1104H,p.H46H,p.H46H,p.D1104H,p.D1104H,p.D1104H,p.H46H,p.D1104H,p.H46H,p.D1104H,p.H46H,p.H46H,p.D1104H,p.H46H,p.D1104H,p.D1104H,p.H46H,p.D1104H,p.D1104H,p.D1104H,p.D1104H,p.H46H,p.D1104H,p.H46H,p.D1104H,p.D1104H,p.D1104H,p.D1104H,p.H46H,p.D1104H,p.D1104H,p.H46H,p.H46H,p.D1104H,p.D1104H,p.D1104H,p.H46H,p.D1104H,p.D1104H,p.D1104H,p.H46H,p.D1104H,p.H46H,p.H46H,p.D1104H,p.H46H,p.D…	0	N/A
XRCC1	0.34375	p.Q399R,p.Q399R,p.R194W,p.Q399R,p.Q399R,p.Q399R,p.R194W,p.Q399R,p.R194W,p.Q399R,p.Q399R,p.R194W,p.Q399R,p.R194W,p.Q399R,p.R194W,p.Q399R,p.R194W,p.Q399R,p.Q399R,p.Q399R,p.R194W,p.Q399R,p.Q399R,p.Q399R,p.Q399R,p.Q399R,p.R194W,p.Q399R,p.R194W,p.Q399R,p.R194W,p.Q399R,p.R194W,p.Q399R,p.R194W,p.Q399R,p.R194W,p.Q399R,p.R194W,p.Q399R,p.R194W,p.Q399R,p.R194W,p.Q399R,p.Q399R,p.Q399R,p.R194W,p.Q399R,p.Q399R…	0.0117647	p.V495M
AKT2	0.3375	N/A	0.0117647	gain
UGT1A1	0.33125	p.G71R,p.G71R,p.G71R,p.G71R,p.P229Q,p.P229Q,p.G71R,p.G71R,p.G71R,p.G71R,p.G71R,p.G71R,p.G71R,p.G71R,p.G71R,p.G71R,p.G71R,p.G71R,p.G71R,p.G71R,p.G71R,p.G71R,p.G71R,p.G71R,p.G71R,p.G71R,p.G71R,p.G71R,p.G71R,p.G71R,p.G71R,p.G71R,p.G71R,p.G71R,p.G71R,p.G71R,p.G71R,p.G71R,p.G71R,p.P364L,p.G71R,p.G71R,p.G71R,p.G71R,p.G71R,p.G71R,p.G71R,p.G71R,p.G71R,p.G71R,p.G71R,p.G71R,p.G71R	0.38	p.G71R,p.G71R,p.G71R,p.G71R,p.P229Q,p.P229Q,p.G71R,p.G71R,p.G71R,p.G71R,p.G71R,p.G71R,p.G71R,p.G71R,p.G71R,p.G71R,p.G71R,p.G71R,p.G71R,p.G71R,p.G71R,p.G71R,p.G71R,p.G71R,p.G71R,p.G71R,p.G71R,p.G71R,p.G71R,p.G71R,p.G71R,p.G71R,p.G71R,p.G71R,p.G71R,p.G71R,p.G71R,p.G71R,p.G71R,p.P364L,p.G71R,p.G71R,p.G71R,p.G71R,p.G71R,p.G71R,p.G71R,p.G71R,p.G71R,p.G71R,p.G71R,p.G71R,p.G71R
MN/AT1	0.325	N/A	0	N/A
ATM	0.3125	p.H42R,p.S2168L,p.K92T,p.D408E,p.P2974L,p.D860N,p.L927F,p.T2228I,p.C907F,p.D1853N,p.D1853N,p.G2023E,p.K2933E,p.D1853N	0.117647	p.Y264C,p.G2772A,p.Q201P,p.P2974L,p.M349_A350delinsIT,p.E2457Q,p.V1268M,p.R23Q,p.P1829S,p.Q1825E,p.G2765S
XPC	0.30625	p.Q939K,p.Q939K,p.Q939K,p.Q939K,p.Q939K,p.Q939K,p.Q939K,p.Q939K,p.Q939K,p.Q939K,p.Q939K,p.Q939K,p.Q939K,p.Q939K,p.Q939K,p.Q939K,p.Q939K,p.Q939K,p.Q939K,p.Q939K,p.Q939K,p.Q939K,p.Q939K,p.Q939K,p.Q939K,p.Q939K,p.Q939K,p.Q939K,p.Q939K,p.Q939K,p.Q939K,p.Q939K,p.Q939K,p.Q939K,p.Q939K,p.Q939K,p.Q939K,p.Q939K,p.Q939K,p.Q939K,p.Q939K,p.Q939K,p.Q939K,p.Q939K,p.Q939K,p.Q939K,p.Q939K,p.Q939K,p.Q939K	0	N/A
OGG1	0.2875	p.S326C,p.S326C,p.S326C,p.S326C,p.S326C,p.S326C,p.S326C,p.S326C,p.S326C,p.S326C,p.S326C,p.S326C,p.S326C,p.S326C,p.S326C,p.S326C,p.S326C,p.S326C,p.S326C,p.S326C,p.S326C,p.S326C,p.S326C,p.S326C,p.S326C,p.S326C,p.S326C,p.S326C,p.S326C,p.S326C,p.S326C,p.S326C,p.S326C,p.S326C,p.S326C,p.S326C,p.S326C,p.S326C,p.S326C,p.S326C,p.S326C,p.S326C,p.S326C,p.S326C,p.S326C,p.S326C	0	N/A
MMS19	0.28125	N/A	0	N/A
XRCC3	0.275	p.T241M,p.T241M,p.T241M,p.T241M,p.T241M,p.T241M,p.T241M,p.T241M	0	N/A
CHEK2	0.2625	p.R406C,p.S412N,p.A480T,p.D409N,p.S44T,p.S252N,p.H371Y,p.S252N	0	N/A
NBN	0.2625	N/A,p.E185Q,p.E185Q,p.E185Q,p.E185Q,p.E185Q,p.E185Q,p.E185Q,p.V346M,p.E185Q,p.E185Q,p.E185Q,p.E185Q,p.E185Q,p.E185Q,p.E185Q,p.E185Q,p.E185Q,p.E185Q,p.E185Q,p.E185Q,p.E185Q,p.F603L,p.E185Q,p.E185Q,p.E185Q,p.E185Q,p.E185Q,p.E185Q,p.E185Q,p.E185Q,p.E185Q,p.E185Q,p.E185Q,p.E185Q,p.E185Q,p.E185Q,p.E185Q,p.E185Q	0	N/A
BRCA1	0.25625	p.P346S,p.H1862L,p.A1199V,p.S1613G,p.K1183R,p.S1613G,p.K1183R,p.S1613G,p.K1183R,p.S1613G,p.K1183R,p.S1613G,p.K1183R,p.S1613G,p.K1183R,p.S1613G,p.K1183R,p.S1613G,p.K1183R,p.S1613G,p.K1183R,p.F709_T710del,p.S1613G,p.K1183R,p.S1486C,p.S1613G,p.K1183R,p.S1613G,p.K1183R,p.S1613G,p.K1183R,p.S1613G,p.K1183R,p.S1613G,p.K1183R,p.R762S,p.I783V,p.S1613G,p.K1183R,p.S1613G,p.K1183R,p.S1613G,p.K1183R,p.S1613G,…	0.0235294	p.D67N,p.E1112Q
APEX1	0.24375	p.D148E,p.D148E,p.D148E,p.D148E,p.D148E,p.D148E,p.D148E,p.D148E,p.D148E,p.D148E,p.D148E,p.D148E,p.D148E,p.D148E,p.D148E,p.D148E,p.D148E,p.D148E,p.D148E,p.D148E,p.D148E,p.D148E,p.D148E,p.D148E,p.D148E,p.D148E,p.D148E,p.D148E,p.D148E,p.D148E,p.D148E,p.D148E,p.D148E,p.D148E,p.D148E,p.D148E,p.D148E,p.D148E,p.D148E	0.0117647	p.P2A
GTF2H1	0.24375	N/A	0	N/A
ERCC6	0.2375	N/A	0.0117647	p.G289V
POLK	0.2375	p.A309A,p.A309A,p.A309A,p.A309A,p.A309A,p.A309A,p.A309A,p.A309A,p.A309A,p.A309A,p.A309A,p.A309A,p.A309A,p.A309A,p.A309A,p.A309A,p.A309A,p.A309A,p.A309A,p.A309A,p.A309A,p.A309A,p.A309A,p.A309A,p.A309A,p.A309A,p.A309A,p.A309A,p.A309A,p.A309A,p.A309A,p.A309A,p.A309A,p.A309A,p.A309A,p.A309A,p.A309A,p.A309A	0	N/A
REV1	0.2	N/A	0	N/A
BCL2L11	0.1875	N/A	0	N/A
CASP8	0.1625	N/A	0	N/A
LIG4	0.15625	p.T9I,p.T9I,p.T9I,p.T9I,p.T9I,p.T9I,p.T9I,p.T9I,p.T9I,p.T9I,p.T9I,p.T9I,p.T9I,p.T9I,p.T9I,p.T9I,p.T9I,p.T9I,p.T9I,p.T9I,p.T9I,p.T9I,p.T9I,p.T9I,p.T9I	0	N/A
PTEN	0.15	N/A	0.0588235	p.K66N,p.D107V,loss,p.K80*
XRCC5	0.14375	N/A	0	N/A
FANCD2	0.11875	p.T908I,p.T908I,p.F386V,p.P714L,p.P714L,p.Y733C,p.F386V,p.F386V,p.T908I,p.T908I,p.T908I,p.F386V,p.P714L,p.T467T,p.V379V,p.T393T,p.S390S,p.T467T,p.V379V,p.T393T,p.S390S,p.T467T,p.V379V,p.T393T,p.S390S,p.P714L,p.P714L,p.P714L	0.0352941	p.R794*,p.S445C
BARD1	0.1125	p.R658C,p.V507M,p.V507M,p.I258T,p.H433R,p.V507M,p.V507M,p.V507M,p.V507M,p.V507M,p.R658C,p.V507M,p.R658C,p.V507M,p.V507M,p.R658C,p.V507L,p.R658C	0.117647	p.V531F,p.T562S,p.R565H,p.R58*,p.S728F,p.M621I,p.E223D,loss,p.C336Y,p.N425S
AKT1	0.1125	N/A	0.0117647	p.E341K,p.E341D
POLE	0.10625	p.I238F,p.S2176I,p.K210R,p.A252V,p.A252V,p.A252V,p.V2025M,p.A252V,p.A252V,p.G1535S,p.R1679C,p.A252V,p.A252V,p.V888A,p.A252V,p.V1760M,p.A252V,p.A252V	0.0588235	p.R685W,p.F1030L,p.M829I,p.G854G,p.Q1341L
TSC2	0.1	p.N1225del,p.V789I,p.A1323V,p.A1141T,p.S1085L,p.A837G,p.D559V,p.L345F,p.E114K,p.P1446L,p.A1297T,p.A1141T,p.E1490G,p.F38Y,p.Y1540Y,p.P1786R	0.0352941	N/A,p.G1151S,p.I1357N
XPA	0.09375	N/A	0	N/A
APC	0.08125	p.S2296N,p.A884V,p.N372D,p.A1753P,p.R1239K,p.S79G,p.G1735R,p.V1125A,p.S1126R,p.S350S,p.A2778S,p.S1126G,p.A1879S,p.I2756V	0.176471	loss,p.E2582*,p.P1778T,p.S2000C,p.E1284Q,p.E2015K,p.K2049E,p.T1218M,p.V1125A,p.E1552*,p.I1918V,p.D1394Y,loss,p.E633Kfs*13,p.K670*,p.K1893N
RAD51	0.075	N/A	0.0117647	p.E308Q
FANCA	0.06875	p.S1061G,p.R360H,p.I525V,p.R1011C,p.E1240K,p.R163H,p.E559K,p.C625Y,p.H913Qfs*29,p.R487W,p.K31N	0.0941176	p.E559K,p.K847E,p.G441D,p.G971V,p.E647D,loss,p.K1413Efs*11,loss
ALK	0.06875	p.M1478T,p.K1525E,p.R672S,p.V349I,p.A877T,p.I762V,p.A371T,p.K1416N,p.K1525E,p.K1525E,p.S639S,p.A371T	0.0823529	p.R1436H,p.R806G,p.S62W,p.Q1146K,p.L1145R
ROS1	0.06875	p.S615Y,p.E1605Q,p.H1237R,p.E1605Q,p.S1765R,p.V2089M,p.T776M,p.E1605Q,p.D725N,p.W170*,p.N1936S	0.0823529	p.P1263S,p.D331H,p.L1516F,p.W1771L,p.Y1491D,p.L590P
ATR	0.06875	p.M1617I,p.N1153S,p.M320V,p.M197I,p.D867N,p.I1223M,p.L1002V,p.M1919T,p.V2491I,p.Y2046Y,p.T1772M	0.0588235	p.L1128F,p.A880V,p.S601P,p.A1363Rfs*2,p.M11I,p.A1828T
BRCA2	0.05625	p.T582P,p.A2786T,p.R3384*,p.K1533N,p.K531E,p.F266L,p.P3243L,p.H1458Y,p.T1359I	0.0823529	p.L1616*,p.W31*,p.N863Ifs*11,p.R2099T,p.I2105T,p.N2048K,p.N2051K,p.N802D,p.S1955L
PTCH1	0.05625	p.G37E,p.T1404A,p.S1033G,p.P1318L,p.T1404A,p.H178N,p.D1146N,p.G1163S,p.V690I	0.0588235	p.T416S,p.D260Y,p.R1391Q,p.G238V,p.S438N
TPMT	0.05625	p.Y240C,p.Y240C,p.Y240C,p.Y240C,p.Y180F,p.Y240C,p.Y240C,p.Y240C,p.A154T,p.Y180F	0	N/A
PIK3CA	0.05	N/A	0.129412	gain,p.E542G,p.E542K,p.M1043V,p.D717G,gain,gain,p.M286I,p.E722K,p.E726K,gain,gain
ARID1A	0.05	p.I1954V,p.M50V,p.P490L,p.M50V,p.P1771S,p.R1323C,p.A1522T,p.V1982I	0.0941176	p.S617*,p.I908N,p.D1850Tfs*33,p.V1982I,p.T290A,p.E38Q,p.Q479*,p.Q1334*,p.P2140T,p.Q1095*,p.D2157Y
RAD50	0.05	p.K292T,p.L1264F,p.K1301R,p.T532I,p.I429Mfs*3,p.Q404R,p.T532I	0.0235294	p.R1098P,p.M415L
MSH6	0.04375	p.P1082S,p.R1034W,p.R901H,p.G355S,p.G355S,p.S935T,p.P55L	0.0352941	p.G1216R,p.C496Y,p.A1220T
MTOR	0.0375	p.R1683W,p.T1870S,p.H640R,p.D1812N,p.H640R,p.A1134V	0.0705882	p.S487R,p.R454C,p.T1977R,p.R2397T,p.D1649H,p.K1706N,p.T220S
LRP1B	0.03125	p.A3020T,p.T4455I,p.R2165W,p.T1598K,p.N883D	0.296118	p.G2406L,p.V2268L,p.S2421*,p.G513C,p.G4508D,p.T701S,p.C2694F,p.G3156V,p.C3681S,p.R3026S,p.G444E,p.P1530T,p.C77F,p.Q3040R,p.K1726N,p.C4181Y,p.D1433V,p.E1436Q,p.R3719K,p.K1210E,p.C153S,p.T923T,p.G683V,p.Y3228N,p.I4439S,loss,p.D992N,p.A3463S,p.H4145R,p.L4235F,p.S1184I,p.E1956*,p.S2046Y,p.R1072C,p.C886F,p.L695M
NF1	0.03125	p.K662R,p.A1125V,p.A188E,p.I2681V	0.0941176	p.S2705C,p.E1894*,p.T2415S,p.D2632N,p.Q2234E,p.D1781Y,p.K810R
BRAF	0.03125	p.D22N,p.D22N,p.D22N,p.D22N,p.D22N	0.0588235	p.W604L,gain,p.G466V,p.D22N,p.R443T,p.G469A
DICER1	0.03125	p.N1112D,p.I561V,p.S678F,p.E1425del,p.N1921S	0.0352941	p.D871N,p.G1665Mfs*3,p.D305Y
FANCG	0.03125	p.R141C,p.V125dup,p.T568A,p.V125dup,p.S603F	0.0352941	p.L597F,gain,p.A153G,p.K19E
SPTA1	0.025	p.T432A,p.R137C,p.I75T,p.A1340P	0.164706	p.H1765L,p.Q342K,p.A2054D,p.L436I,p.A1205V,p.I2357T,p.M1041K,p.R1075T,p.E1131A,p.L946F,p.F1216I,p.R2211S,p.Q2039K,p.E1415K,p.E145D
MET	0.025	p.A1363T,p.F206S,p.R1022Q,p.A1363T	0.0941176	p.D1010Y,p.R1382*,p.F398L,gain,gain,p.G344V,gain,p.N371K
PDGFRA	0.025	p.L221F,p.D756N,p.E750D,p.T992N	0.0705882	gain,p.D568Y,p.S416Y,p.G228V,p.S53T,gain,p.V878I
WT1	0.025	p.S280N,p.H242N,p.P136dup,p.R363S	0.0705882	p.G216D,p.G70D,p.A48V,p.R413K,p.P249T,p.K414Sfs*35
JAK2	0.025	p.D489E,p.S126G,p.M1130T,p.L925I	0.0352941	p.C616Yfs*11,p.D994Vfs*4,gain,p.S280*
KIT	0.025	p.R956W,p.I438V,p.T245A,p.T304A	0.0352941	gain,p.G727V,gain
FGFR3	0.025	p.A500T,p.G44S,p.Q29H,p.K404R	0.0235294	loss,p.S249C
MRE11	0.025	p.I263M,p.S619F,p.P230L	0.0117647	p.K420T
SMARCA4	0.01875	p.Q201L,p.R1411W,p.K1610T	0.152941	p.E488*,p.D743E,p.G775V,p.K981N,p.D1299N,p.Q1236K,p.Q347*,p.I1306_A1307delinsNP,p.K587N,p.L407Sfs*4,p.K484*,p.G637E,p.S837F
KDR	0.01875	p.D814N,p.D814N,p.D814N	0.0705882	p.P956H,gain,p.P1179T,p.R323I,p.D1079Y,p.D814N,gain
RET	0.01875	p.S65G,p.R982H,p.P20dup	0.0588235	p.L18P,p.L410I,p.K477T,p.R721Q,p.R171M
TSC1	0.01875	p.S487C,p.L978V,p.D458E	0.0588235	p.H206D,p.R160C,p.E31D,p.S313Hfs*27
MLH1	0.01875	p.S529C,p.R217C	0.0117647	p.H518Y
EPCAM	0.01875	p.D100N,p.R290G,p.G75D	0	N/A
MEN1	0.01875	p.G503D,p.G503D,p.G503D	0	N/A
FGF19	0.0125	p.L55Sfs*91,p.F200C	0.0823529	gain,p.E184V,gain,p.G205V,gain,gain,gain
FLCN	0.0125	p.D476E,p.E287G	0.0588235	p.D382Tfs*86,p.Q533H,loss,loss,p.F435Lfs*33
CDK4	0.0125	p.H281Y,p.G45D	0.0235294	gain,gain
MUTYH	0.0125	p.T253I,p.A61V	0.0235294	p.R179H,p.M280V
PDCD1LG2	0.0125	p.V62L,p.F236L	0.0235294	p.E63*,gain
PMS2	0.0125	p.R151H,p.R563Q	0.0235294	gain,loss
SDHA	0.0125	p.W121*,p.A72S	0.0235294	gain,p.V364I
NF2	0.0125	p.N303S,p.K543N	0.0117647	p.A98S
CTNNB1	0.0125	p.M98V,p.V94L	0	N/A
RB1	0.00625	p.A525T	0.129412	loss,p.L550S,loss,p.S474R,loss,p.E287D,p.W516*,loss,p.K791*,p.K577Nfs*2
FGFR1	0.00625	p.M534V	0.117647	gain,gain,p.P663T,gain,gain,p.E715K,gain,gain,gain,gain
NTRK1	0.00625	p.R220W	0.0705882	p.A631S,p.S14N,p.R771S,p.R273Q,p.R3Q,p.E324Q
STK11	0.00625	p.L245L	0.0705882	N/A,p.E145*,p.E92Rfs*4,p.E65*,p.Q159*,p.Q220*,loss,p.L45F,loss
NTRK2	0.00625	p.P542T	0.0470588	p.G273A,p.T747M,p.G102V
CDH1	0.00625	p.N432K	0.0352941	p.F317L,p.D549Tfs*8,p.K697N
FH	0.00625	p.R101Q	0.0352941	N/A,p.S11W
FGFR2	0.00625	p.P810S	0.0235294	p.V233L,p.N549K
FLT3	0.00625	p.A425T	0.0235294	p.T353S,p.R931M
SMARCB1	0.00625	p.T150A	0.0235294	gain,p.Q182E
SMO	0.00625	p.S590T	0.0235294	p.P687Q,p.P306L
SUFU	0.00625	p.V369I	0.0235294	p.S72I,p.S351T
BAP1	0.00625	p.A303V	0.0117647	p.F674L
MITF	0.00625	p.A187A	0.0117647	p.D342N
RAD51D	0.00625	p.D167N	0.0117647	p.M16V
AXIN2	0.00625	p.K360M	0	N/A
CHEK1	0.00625	p.S305T	0	N/A
FANCC	0.00625	p.I312Lfs*2	0	N/A
PRKAR1A	0.00625	p.E189D	0	N/A
RAF1	0.00625	p.P332A	0	N/A
CDKN2A	0	N/A,	0.270588	p.R58*,p.H83Y,p.E149*,p.L16Pfs*9,p.P114L,loss,loss,loss,p.G89V,p.D84Y,p.W15*,p.L32del,loss,loss,p.D84H,loss,loss,p.N71Tfs*75,p.D84Y,loss,p.L78Hfs*41,loss,loss
KMT2D	0	N/A,	0.258824	p.Q4275R,p.E4566K,p.Q3839Sfs*42,p.A1390Gfs*42,p.R3127H,p.E436K,p.Q809Pfs*3,p.K3888R,p.P4048L,p.Q4217*,p.G1978C,p.E2286V,p.E1285G,p.Q3863del,p.G1434D,p.R5320H,p.I1450F,p.R5448Q,p.E5440D,p.Q3919del,p.L5288V,p.Q3806*,p.L3955Q,p.A1327Pfs*3,p.R1290Q,p.D3560N,p.E1683D
FAT1	0	N/A,	0.176471	p.A3091T,p.T2997M,p.T784I,p.I1918V,p.D442N,p.S3282C,p.A2536S,p.E4514*,p.T3940A,p.I2939M,p.E3467*,p.D1240V,p.F472C,p.Q906*,p.R3Dfs*68,p.S1051*,p.R1535*
SLIT2	0	N/A,	0.164706	loss,p.V999L,p.A218T,loss,loss,p.S1511F,p.Q162H,p.G1523C,p.A480S,p.R477Vfs*20,p.Y356H,p.R148L,p.V999L,p.L675F,loss,p.S1315C,p.G882V,p.S37I
FAM135B	0	N/A,	0.152941	p.D944V,p.G1275A,p.L310F,p.D944Y,p.L1228I,p.A237P,p.P390Q,p.Q302E,p.D964E,p.D64Y,p.C1037Y,p.P482A,p.D818E,p.G546R
NOTCH2	0	N/A,	0.141176	p.R2347H,p.Q1923Rfs*14,p.S1445G,p.S2286R,p.A3F,p.P1138L,p.R2044H,p.V2067E,p.P1195A,p.W1450C,p.S1212C,p.Q767P
CDKN2B	0	N/A,	0.129412	loss,loss,loss,loss,loss,loss,loss,loss,loss,loss,loss
KRAS	0	N/A,	0.117647	p.G12A,p.G12V,p.G12D,p.G12D,p.G12V,p.G12V,p.G12V,gain,gain,p.G12V
NFE2L2	0	N/A,	0.117647	p.G31R,p.D21Y,gain,p.W24C,p.L19F,p.W24C,p.D77Y,p.E55Q,p.W24R,p.V32G,p.W24C,p.L23P,p.R449H
ADGRA2	0	N/A,	0.105882	gain,p.E520*,p.G719R,p.P871Q,p.S607Y,p.L443M,p.G893E,gain,p.H551Q,p.V175Gfs*3
KEAP1	0	N/A,	0.105882	p.T277M,p.Y567*,p.A101T,p.H562P,p.G480V,p.A248T,p.E441*,p.S102L,p.R135C
KMT2C	0	N/A,	0.105882	p.R894Q,p.R380L,p.G315S,p.C391*,p.G908C,p.A1685S,p.S1630*,p.P3583L,p.P3555R,p.D3595Y,p.P2341Nfs*25,p.I1344*,p.P27Q,p.T2803I,p.L2662F
NOTCH1	0	N/A,	0.105882	p.V1222M,p.G275S,p.C922G,p.T1927M,p.E1719*,p.G200C,p.P2222L,p.I1445Mfs*135,p.V1721G,p.P2475*,p.E2062*
NRG3	0	N/A,	0.105882	p.R639Q,p.G402C,p.G528W,p.R283P,p.G109V,p.S530*,p.I598M,p.G480E,p.G402C
PTK2	0	N/A,	0.105882	gain,gain,p.R498H,p.P745L,p.P898L,p.Q91*,p.Q807P,gain,p.R251K
CREBBP	0	N/A,	0.0941176	p.Q503*,p.G262*,p.R1103*,p.D1105H,p.Q2167H,p.I1643M,p.Q482Lfs*8
EPHA5	0	N/A,	0.0941176	p.A402S,p.G1033*,p.D449N,p.H1015N,p.A364V,p.R417W,p.V202A,p.S949Y
FGF3	0	N/A,	0.0941176	gain,gain,gain,p.Q146K,p.S232Y,gain,gain,gain
LRP1	0	N/A,	0.0941176	p.S2934L,p.P4542H,p.G813R,p.R3629H,p.I3462V,p.D1042Y,p.E50D,p.S4251C,p.E3577D
MED12	0	N/A,	0.0941176	p.K1788Q,p.D1145Y,p.R2156L,p.R1713L,p.Q2086del,p.D385H,p.E904*,p.Y734C
NKX2-1	0	N/A,	0.0941176	p.H193P,p.K181Nfs*16,gain,gain,gain,gain,gain,p.G284D,gain
SOX2	0	N/A,	0.0941176	gain,gain,p.M217I,p.A204S,gain,gain,gain,gain
CARD11	0	N/A,	0.0823529	gain,p.L1116M,gain,p.G569*,gain,gain,gain
FBXW7	0	N/A,	0.0823529	p.R479P,p.T163A,loss,p.G670*,p.R179C,p.R505C
GLI2	0	N/A,	0.0823529	p.G1046R,p.P107Q,p.S174L,gain,p.M911I,p.G1385A,p.E1376K,p.P28T
GLI3	0	N/A,	0.0823529	p.N1314D,p.R52T,p.G709Lfs*29,p.D275D,p.E456K,gain,p.V778L,p.M824I
KMT2A	0	N/A,	0.0823529	p.R12G,p.H801Y,p.Q3206H,p.V661I,p.R1264L,p.G3131S,p.P3549S
RBM10	0	N/A,	0.0823529	p.Q267Rfs*41,p.L363R,p.E77Q,p.R186*,p.Q364*
RUNX1	0	N/A,	0.0823529	p.E8Q,p.L446F,p.P425L,p.Y385Sfs*209,p.R423H,p.R162S,p.E316*
SMARCA2	0	N/A,	0.0823529	loss,p.E68*,p.A282V,p.Q237_Q238del,loss,p.E1531K,p.Q238dup
TAF1	0	N/A,	0.0823529	p.E1024D,p.E1788D,p.P163L,p.A833Pfs*14,p.G354C,p.D474H,p.D670Y,p.P160H
AR	0	N/A,	0.0705882	p.R727C,p.A420V,p.Q557H,p.Q79_Q80dup,p.Q77_Q80del,p.Q77_Q80del
BCL6	0	N/A,	0.0705882	gain,gain,gain,gain,gain,gain
CCND1	0	N/A,	0.0705882	gain,gain,gain,gain,gain,gain
EPHA7	0	N/A,	0.0705882	p.R676K,p.T902S,p.G823V,p.I808T,loss,p.L19R
FGF4	0	N/A,	0.0705882	gain,gain,gain,gain,gain,gain
GRIN2A	0	N/A,	0.0705882	p.E789D,p.G712R,p.S445L,p.K1235M,p.R1050T
HGF	0	N/A,	0.0705882	p.G265V,p.P81Q,p.G31*,p.E640K,p.V64L,p.H335Y,p.G648R
IRS2	0	N/A,	0.0705882	p.T443S,p.S669R,p.A701dup,p.Y814C,p.A180S,gain,gain
KNL1	0	N/A,	0.0705882	p.D1307N,p.L95P,p.E110K,p.L95P,p.E110K,p.E110K,p.E110K,p.E110K
PBRM1	0	N/A,	0.0705882	p.Y470C,p.E742*,p.S941L,p.T1442A
PREX2	0	N/A,	0.0705882	p.A315T,p.V273L,p.G40D,p.Y464C,p.A196S,p.M204V
SMAD4	0	N/A,	0.0705882	p.S343*,loss,p.R361H,p.R380W,p.S227G,p.G145V
TYK2	0	N/A,	0.0705882	p.R701T,p.R701T,p.S580C,p.R397W,p.R269C,p.R992L,p.A654Gfs*29
ZNF703	0	N/A,	0.0705882	p.S585L,gain,gain,p.S429L,p.P13S,gain,gain
ARID2	0	N/A,	0.0588235	p.S145R,p.G1139Sfs*20,p.Q144E,p.G1762V,p.T1540Nfs*4
ATRX	0	N/A,	0.0588235	p.S71C,p.S68L,p.G1240R,p.K826N,p.E1967K,p.Q2415Afs*13
CTNND2	0	N/A,	0.0588235	p.A887G,p.A251K,p.H690Q,p.D820N,p.V566F
FGFR4	0	N/A,	0.0588235	p.E717Rfs*8,p.A742G,p.M600L,p.K607R,p.I233M
FRS2	0	N/A,	0.0588235	gain,gain,gain,gain,p.D367V
GLI1	0	N/A,	0.0588235	p.G744E,p.Y743*,p.A978Qfs*42,p.R557C,p.M164I
IL7R	0	N/A,	0.0588235	p.H154Y,p.S185I,gain,gain,p.S443*
INPP4B	0	N/A,	0.0588235	p.M619I,p.R250Q,p.M310T,p.S415G,loss
KLHL6	0	N/A,	0.0588235	gain,p.A52T,gain,gain,gain,gain
MAP3K1	0	N/A,	0.0588235	loss,p.R377T,p.A117V,p.E504K,p.T949del
MYC	0	N/A,	0.0588235	gain,gain,gain,gain,gain
NOTCH3	0	N/A,	0.0588235	p.D623N,p.F1281L,p.G1059W,p.K1730*,p.G1329V,gain,p.G2V
PRKCI	0	N/A,	0.0588235	gain,gain,p.K286E,gain,gain
RAD51B	0	N/A,	0.0588235	p.Q371*,p.Q371*,p.Q371*,p.Q371*,p.Q371*
RICTOR	0	N/A,	0.0588235	p.C68F,gain,gain,p.M183V,p.T210I
ROCK1	0	N/A,	0.0588235	p.E611K,p.E1203*,p.E766D,p.M658L,p.E1088D
SETD2	0	N/A,	0.0588235	p.G2299R,p.T159S,p.S1849W,p.E608*,p.S1442L,p.F1589C
SPEN	0	N/A,	0.0588235	p.H3072D,loss,p.D1322H,p.R1362Ifs*2
TBX3	0	N/A,	0.0588235	p.A414D,p.G552S,p.G448R,p.R447C,p.R447G,p.D337V,p.G689C,p.R695H,p.H117D,p.M534V
ADAM29	0	N/A,	0.0470588	p.P666T,p.T800_L808del,p.W467R,p.K271N,p.P725A
ARID1B	0	N/A,	0.0470588	p.T2011M,p.D2196H,p.A274del,p.G1809C
BCOR	0	N/A,	0.0470588	p.N1293D,p.L1345V,p.H682L,p.A320V
CBL	0	N/A,	0.0470588	p.M487V,p.P484T,p.S524C
CDK12	0	N/A,	0.0470588	gain,p.Q547*,gain,p.E131K
DNMT3A	0	N/A,	0.0470588	p.E342Q,p.T12S,p.G822Afs*3,p.E205D,p.G543A
EP300	0	N/A,	0.0470588	p.E1263*,p.G168E,p.P16L,p.T1282_K1291del
ERBB4	0	N/A,	0.0470588	p.V1134L,p.P1248_P1249delinsQ,p.N814Y,p.L644I
FANCM	0	N/A,	0.0470588	p.R573*,p.S625T,p.L315*,p.R798G
FLT1	0	N/A,	0.0470588	gain,p.L242*,p.L889Q,p.K118M
FLT4	0	N/A,	0.0470588	gain,p.W255*,p.P484Q,p.K311*
GATA3	0	N/A,	0.0470588	p.H79N,p.Y186H,loss,p.W10L
GATA4	0	N/A,	0.0470588	p.G135V,p.D209Y,loss,loss
JAK3	0	N/A,	0.0470588	p.E694K,p.H514N,gain,p.D776E,gain
KDM5C	0	N/A,	0.0470588	gain,p.R198*,p.A388S,p.Q588L
KEL	0	N/A,	0.0470588	p.P564H,p.R130W,p.V680Gfs*4,p.A376S,p.R180L
LZTR1	0	N/A,	0.0470588	gain,p.A303S,p.R53C,loss
MYCN	0	N/A,	0.0470588	p.R398W,p.A184S,gain,p.G151E
NRG1	0	N/A,	0.0470588	p.L75P,gain,p.R220C,p.L483M
PDGFRB	0	N/A,	0.0470588	p.N479Y,p.S888F,p.A1033S,p.C291S
PIK3CG	0	N/A,	0.0470588	N/A,p.G426Rfs*12,p.I365M,p.I365M
PIK3R1	0	N/A,	0.0470588	loss,loss,loss
PIK3R2	0	N/A,	0.0470588	p.A257T,p.A707V,gain,p.E543K
POLQ	0	N/A,	0.0470588	p.I1892V,p.R2175T,p.E736Kfs*2
RPTOR	0	N/A,	0.0470588	p.D942_A944del,p.A964T,p.M1197I,p.A536S
RUNX1T1	0	N/A,	0.0470588	p.H512Y,p.E407D,p.A461E,p.T526K
SRMS	0	N/A,	0.0470588	p.*489Sext*59,p.A10S,p.R65Q,gain
TNK2	0	N/A,	0.0470588	p.G666C,gain,gain,p.R562Q
ZFHX3	0	N/A,	0.0470588	p.G3526_G3527dup,p.R3381_Q3389del,p.G3511_G3512dup,p.G3511_G3512dup,p.A472E,p.A1576G
ZNF217	0	N/A,	0.0470588	p.V960L,p.T1048Lfs*59,p.Q783Ifs*23,p.S816C,gain
ABL1	0	N/A,	0.0352941	p.Y167*,p.G706V,p.K609del
ACVR2A	0	N/A,	0.0352941	loss,p.*514Sext*18,loss
CDK8	0	N/A,	0.0352941	N/A,gain
CEBPA	0	N/A,	0.0352941	gain,p.P42A,p.K352M
COL7A1	0	N/A,	0.0352941	N/A,p.D646H,p.P2498S
CRKL	0	N/A,	0.0352941	gain,gain,gain
CUL3	0	N/A,	0.0352941	p.E386K,p.D26Y,p.E323*
DDR2	0	N/A,	0.0352941	p.V770L,p.T243S,p.S463G
EGF	0	N/A,	0.0352941	p.D1153E,p.R567H
EML4	0	N/A,	0.0352941	N/A
EPHA3	0	N/A,	0.0352941	N/A,p.D598Y
ERBB2	0	N/A,	0.0352941	gain,gain,p.R536Q
FGF10	0	N/A,	0.0352941	p.R187M,gain,p.Y141C
FOXL2	0	N/A,	0.0352941	p.I85S,p.G182W,p.P287A
GATA6	0	N/A,	0.0352941	p.S184N,p.P54L,p.A275S
IGF1R	0	N/A,	0.0352941	p.Y43C,p.A828S
IKZF1	0	N/A,	0.0352941	p.E26V,p.M249R
KDM5A	0	N/A,	0.0352941	p.D1685Y,p.C679F,gain
MECOM	0	N/A,	0.0352941	p.E127K,p.T294M,p.S892C
NFKBIA	0	N/A,	0.0352941	gain,gain,gain
NSD1	0	N/A,	0.0352941	p.T2382I,p.T545M,p.H1104R
NTRK3	0	N/A,	0.0352941	p.Q177*,p.L108M,p.E750K
PARP4	0	N/A,	0.0352941	p.V1065A,p.P143T
PIK3CB	0	N/A,	0.0352941	p.E255K,p.E540K,gain
POLG	0	N/A,	0.0352941	p.E173*,p.G91V,p.D133Y
POLI	0	N/A,	0.0352941	p.D15G,p.D15G,p.D15G
RANBP2	0	N/A,	0.0352941	p.K3035Nfs*6,p.G364C,p.K1479R
SMAD2	0	N/A,	0.0352941	p.Y406C,loss,p.G30V
STAG2	0	N/A,	0.0352941	p.E31*,p.R1066L,p.N286I
STAT3	0	N/A,	0.0352941	p.D661Y,p.E139*,p.Q182H
TEK	0	N/A,	0.0352941	p.G98S,p.E734K,p.P733Q,p.H606Y
TERT	0	N/A,	0.0352941	N/A,p.E20*
TET2	0	N/A,	0.0352941	p.R571C,p.H1676L
TGFBR1	0	N/A,	0.0352941	p.D385E,p.M503I,p.E447Q
TNFSF11	0	N/A,	0.0352941	p.R78K,p.Y69C,p.A43Pfs*49
TOP2A	0	N/A,	0.0352941	p.K436M,p.D660N,p.D1107G
ZBTB16	0	N/A,	0.0352941	p.P528A,p.R498C,p.E575*
AFF3	0	N/A,	0.0235294	p.G445S,p.G445S
AKT3	0	N/A,	0.0235294	p.R239T,p.L109V
AMER1	0	N/A,	0.0235294	p.G954V,p.G1031S
ARAF	0	N/A,	0.0235294	p.V51L,p.L604I
ASXL1	0	N/A,	0.0235294	p.G738V,p.C1240R
AXIN1	0	N/A,	0.0235294	p.I144M,p.F292Y
AXL	0	N/A,	0.0235294	p.S884F,gain
BCORL1	0	N/A,	0.0235294	p.S867L,p.P386Qfs*32
CCND3	0	N/A,	0.0235294	gain,gain
CCNE1	0	N/A,	0.0235294	p.G406W,gain
CD79B	0	N/A,	0.0235294	p.L148F,p.Y196S
CDC73	0	N/A,	0.0235294	p.I224T
CDH11	0	N/A,	0.0235294	p.P386L,p.G686A
CHD2	0	N/A,	0.0235294	p.G1130R,p.G1575C
CHD4	0	N/A,	0.0235294	p.V659M,p.G355V
CIC	0	N/A,	0.0235294	p.T790S,p.S68C
CLK2	0	N/A,	0.0235294	p.Q381Q,p.N221H
CSF3R	0	N/A,	0.0235294	p.Q752E,p.G165R
CYLD	0	N/A,	0.0235294	p.Q905*,p.T393A
DDR1	0	N/A,	0.0235294	gain,p.G109Afs*32
DOT1L	0	N/A,	0.0235294	p.Q252*,p.E123Rfs*25
ELK4	0	N/A,	0.0235294	p.P346Hfs*20,p.T334M
EMSY	0	N/A,	0.0235294	gain,gain
EPHA2	0	N/A,	0.0235294	p.T297M,p.F119Lfs*43,p.S114F
EPHB1	0	N/A,	0.0235294	p.H970L,p.P540L
ERBB3	0	N/A,	0.0235294	p.E555G,p.A304S
ERCC4	0	N/A,	0.0235294	p.E355K,p.E355K
ERG	0	N/A,	0.0235294	p.R353S,p.S46R
ESR1	0	N/A,	0.0235294	p.L265Ffs*9,p.D313N,p.E385D
FAAP20	0	N/A,	0.0235294	p.R17P,p.R17P
FAM47C	0	N/A,	0.0235294	p.L801Q,p.S895*
FANCB	0	N/A,	0.0235294	p.N99K,p.N99K
FANCE	0	N/A,	0.0235294	p.Q335*,p.A24P
FAT4	0	N/A,	0.0235294	p.C4489Y,p.Y3303C
FGF6	0	N/A,	0.0235294	p.F138C,p.Y148*
GATA2	0	N/A,	0.0235294	gain,p.P87R
GFI1	0	N/A,	0.0235294	N/A,p.D313H
GRM3	0	N/A,	0.0235294	p.K635N,p.R797T
GSK3B	0	N/A,	0.0235294	p.G416E,gain
HNF1A	0	N/A,	0.0235294	p.G292Rfs*25,p.S432Y
IGF2	0	N/A,	0.0235294	p.R48G,p.P173Qfs*27
ITK	0	N/A,	0.0235294	p.R581W,p.V275L
KAT6A	0	N/A,	0.0235294	p.C293F,gain
KDM6A	0	N/A,	0.0235294	p.D280H,p.R658Q
LCK	0	N/A,	0.0235294	p.K379N,p.E176V
LIFR	0	N/A,	0.0235294	N/A,p.E219V
LYN	0	N/A,	0.0235294	p.M478I,gain
MAGI2	0	N/A,	0.0235294	p.R965H,p.T706K,p.P1110T
MAP2K4	0	N/A,	0.0235294	p.V192L,loss
MAP4K5	0	N/A,	0.0235294	N/A,p.C626S
MPL	0	N/A,	0.0235294	p.K297N,gain
MYCL	0	N/A,	0.0235294	p.I59M,gain
NEIL3	0	N/A,	0.0235294	p.L119F,p.A470P
NRAS	0	N/A,	0.0235294	p.Q61L,p.Q61R
NUDT1	0	N/A,	0.0235294	N/A,p.I4S
PHOX2B	0	N/A,	0.0235294	p.G215C,p.A260dup
PIK3C2B	0	N/A,	0.0235294	p.P526A,p.W645C
PLCG2	0	N/A,	0.0235294	p.T292M,p.W646C
PPP2R1A	0	N/A,	0.0235294	p.A224V,p.F151L
PPP4R3A	0	N/A,	0.0235294	p.D644H,p.E337*
PRDM1	0	N/A,	0.0235294	p.G599E,p.E55Q
PRDM9	0	N/A,	0.0235294	p.S265Y,p.Q435R
PRSS8	0	N/A,	0.0235294	loss,loss
PTK6	0	N/A,	0.0235294	gain,gain
RASA1	0	N/A,	0.0235294	N/A,p.L606P
REV3L	0	N/A,	0.0235294	p.E1593K,p.E1593K
RNF213	0	N/A,	0.0235294	p.R2409W,p.V4884I
RNF43	0	N/A,	0.0235294	loss,p.H472Y
SGK1	0	N/A,	0.0235294	p.E392Q
SH2B3	0	N/A,	0.0235294	p.D91Y,p.E123K
SOCS1	0	N/A,	0.0235294	p.F148L,p.A8Pfs*111
SOS1	0	N/A,	0.0235294	p.I601F,p.I1198V
STAT4	0	N/A,	0.0235294	gain,p.M517I
SYK	0	N/A,	0.0235294	p.E130G,p.P258L
TELO2	0	N/A,	0.0235294	p.E7R,p.E7R
TET1	0	N/A,	0.0235294	p.T1689A,p.P1835L,p.I173T
TGFBR2	0	N/A,	0.0235294	p.T309M,p.L492F
TOPBP1	0	N/A,	0.0235294	p.N1514K,p.K1044Sfs*17
TP63	0	N/A,	0.0235294	p.A150T,p.M581L
TSHR	0	N/A,	0.0235294	p.W546R,p.T588K
USP6	0	N/A,	0.0235294	p.K66Q,p.S91T,p.T72R,p.H89N,p.S91T,p.T72R,p.G1250R,p.H89N
UVSSA	0	N/A,	0.0235294	p.D602N,p.T93A,p.A460V,p.F200S
WEE2	0	N/A,	0.0235294	p.Y526D,p.E31Q
ABL2	0	N/A,	0.0117647	p.S1065*
ACVR1B	0	N/A,	0.0117647	p.P289S
APTX	0	N/A,	0.0117647	N/A
ARFRP1	0	N/A,	0.0117647	p.T172I
ARHGAP26	0	N/A,	0.0117647	N/A
ARNT	0	N/A,	0.0117647	p.S424F
AURKA	0	N/A,	0.0117647	gain
AURKB	0	N/A,	0.0117647	p.L122M
BAZ1A	0	N/A,	0.0117647	p.R1263L
BCL11B	0	N/A,	0.0117647	p.F395L
BCL2L1	0	N/A,	0.0117647	p.E39*
BCR	0	N/A,	0.0117647	p.S468G
BTK	0	N/A,	0.0117647	gain
CBFA2T3	0	N/A,	0.0117647	p.R198H
CBLB	0	N/A,	0.0117647	N/A
CCNO	0	N/A,	0.0117647	p.S138C
CD274	0	N/A,	0.0117647	gain
CDK6	0	N/A,	0.0117647	gain
CDKN1B	0	N/A,	0.0117647	p.G111Rfs*14
CHD1	0	N/A,	0.0117647	p.Q115K
CIITA	0	N/A,	0.0117647	p.W158*
CRBN	0	N/A,	0.0117647	p.H73Q
CRTC1	0	N/A,	0.0117647	p.G58Pfs*94
CSF1R	0	N/A,	0.0117647	p.P54L
CSK	0	N/A,	0.0117647	p.V71M
CSNK1A1	0	N/A,	0.0117647	p.G265V
CTNN/A1	0	N/A,	0.0117647	p.T506A,p.D510G
CUL1	0	N/A,	0.0117647	p.E353K
CUX1	0	N/A,	0.0117647	p.T1128S
CYSLTR2	0	N/A,	0.0117647	p.T273del
DCLRE1C	0	N/A,	0.0117647	p.Q420H
DDX6	0	N/A,	0.0117647	N/A
DIS3	0	N/A,	0.0117647	p.D488N
DIS3L2	0	N/A,	0.0117647	p.R704C
DNM2	0	N/A,	0.0117647	p.S484F
DNTT	0	N/A,	0.0117647	p.M23T
DOCK8	0	N/A,	0.0117647	p.M1613I
EIF3E	0	N/A,	0.0117647	p.T259A
ELANE	0	N/A,	0.0117647	p.F199F
ELF3	0	N/A,	0.0117647	N/A
ELL	0	N/A,	0.0117647	N/A
EPS15	0	N/A,	0.0117647	p.I289Vfs*4
ERF	0	N/A,	0.0117647	p.A521S
EXT2	0	N/A,	0.0117647	p.G640E
EZH2	0	N/A,	0.0117647	p.R16L
FAAP100	0	N/A,	0.0117647	p.D824Y
FAS	0	N/A,	0.0117647	loss
FGF14	0	N/A,	0.0117647	p.D218E
FGF23	0	N/A,	0.0117647	p.P201L
FOXP1	0	N/A,	0.0117647	N/A
FUBP1	0	N/A,	0.0117647	p.P144S
GABRA6	0	N/A,	0.0117647	p.S287I
GATA1	0	N/A,	0.0117647	p.R271K
GN/A13	0	N/A,	0.0117647	N/A
GN/AS	0	N/A,	0.0117647	gain
HCK	0	N/A,	0.0117647	p.G253A
HDAC2	0	N/A,	0.0117647	p.G218E
HFM1	0	N/A,	0.0117647	p.P268A
HIF1A	0	N/A,	0.0117647	p.S28F
HNRNPA2B1	0	N/A,	0.0117647	p.E62_A68del
HSD3B1	0	N/A,	0.0117647	p.A232Gfs*28
HSP90AA1	0	N/A,	0.0117647	p.K363E
IDH2	0	N/A,	0.0117647	p.G190C
INHBA	0	N/A,	0.0117647	p.G184D
IRF4	0	N/A,	0.0117647	p.C356F
JAK1	0	N/A,	0.0117647	p.N973K
JUN	0	N/A,	0.0117647	p.A13V
KCNT2	0	N/A,	0.0117647	N/A
LIMK1	0	N/A,	0.0117647	p.G190A
MAP2K1	0	N/A,	0.0117647	p.Y130C
MCL1	0	N/A,	0.0117647	p.L186F
MDC1	0	N/A,	0.0117647	p.D305N
MDM4	0	N/A,	0.0117647	p.Q118E
MEF2B	0	N/A,	0.0117647	p.R219Q
MGA	0	N/A,	0.0117647	p.R2529K
MYB	0	N/A,	0.0117647	N/A
MYD88	0	N/A,	0.0117647	p.L265P
NCOR2	0	N/A,	0.0117647	p.S1834Rfs*194
NEK11	0	N/A,	0.0117647	p.L303V
NONO	0	N/A,	0.0117647	p.Q2H
NOTCH2NLA	0	N/A,	0.0117647	N/A
NOTCH4	0	N/A,	0.0117647	p.P204L
NUP93	0	N/A,	0.0117647	p.R730T
PARK2	0	N/A,	0.0117647	p.H68Tfs*13
PCDH9	0	N/A,	0.0117647	p.R4S
PDK1	0	N/A,	0.0117647	p.R343C
PDPK1	0	N/A,	0.0117647	p.N378S
PER3	0	N/A,	0.0117647	p.R3Lfs*12
PHF14	0	N/A,	0.0117647	N/A
PIK3CD	0	N/A,	0.0117647	p.E148*
PLXN/A1	0	N/A,	0.0117647	p.G468Vfs*35
POLD3	0	N/A,	0.0117647	p.F337S
POLE3	0	N/A,	0.0117647	p.V43F
POLN	0	N/A,	0.0117647	p.D204Y
PPM1D	0	N/A,	0.0117647	p.W121*
PPP4R3B	0	N/A,	0.0117647	p.S692I
PPP4R4	0	N/A,	0.0117647	p.S115L
PRDM15	0	N/A,	0.0117647	N/A
PTPN11	0	N/A,	0.0117647	p.S264N
PTPN13	0	N/A,	0.0117647	p.P992L
QKI	0	N/A,	0.0117647	p.E42D
RAD18	0	N/A,	0.0117647	p.N153K
RAD23A	0	N/A,	0.0117647	p.P222L
RAD54L	0	N/A,	0.0117647	p.S657C
RAD9B	0	N/A,	0.0117647	p.L42V
RAP1GDS1	0	N/A,	0.0117647	p.Q97H
RBBP8	0	N/A,	0.0117647	p.Q189K
RCBTB2	0	N/A,	0.0117647	N/A
RECQL	0	N/A,	0.0117647	p.R454H
RFC1	0	N/A,	0.0117647	p.D830Y
RFC3	0	N/A,	0.0117647	p.I329V
RGS7	0	N/A,	0.0117647	p.D294Y
RHBDF2	0	N/A,	0.0117647	p.G152S
RIT1	0	N/A,	0.0117647	N/A
ROCK2	0	N/A,	0.0117647	p.R1343L
RPS6KB1	0	N/A,	0.0117647	N/A
RRM2B	0	N/A,	0.0117647	p.H91Y
RXRA	0	N/A,	0.0117647	p.V332L
SERPINB3	0	N/A,	0.0117647	p.Y181C
SETBP1	0	N/A,	0.0117647	p.P1542H
SIK1	0	N/A,	0.0117647	p.V317L
SLC34A2	0	N/A,	0.0117647	p.R640_C645del,p.S642T
SLX4	0	N/A,	0.0117647	p.S1061F
SMAD3	0	N/A,	0.0117647	p.H126Y
SMUG1	0	N/A,	0.0117647	p.A247V
SPOP	0	N/A,	0.0117647	p.G261A
SRC	0	N/A,	0.0117647	gain
TCF7L2	0	N/A,	0.0117647	loss
THBS2	0	N/A,	0.0117647	p.G735W
TMEM127	0	N/A,	0.0117647	p.S147C
TMPRSS2	0	N/A,	0.0117647	p.P3A
TOP1	0	N/A,	0.0117647	p.Y444H
TRIM37	0	N/A,	0.0117647	p.P583S
USP8	0	N/A,	0.0117647	p.R763W,p.N764K
VHL	0	N/A,	0.0117647	loss
XAB2	0	N/A,	0.0117647	p.D326_R330delinsALL
YES1	0	N/A,	0.0117647	N/A
ZBTB2	0	N/A,	0.0117647	p.D301H
ZNF479	0	N/A,	0.0117647	p.T382K,p.Q388K
ZNF750	0	N/A,	0.0117647	p.R403Pfs*57
ZNRF3	0	N/A,	0.0117647	p.L134R
